# Supplementary material
Source: PubMed Central journal article supplement (PMC3048699)
Supplement: supp_M110.187609_jbc.M110.187609-1.pdf [file supp_M110.187609_jbc.M110.187609-1.pdf]

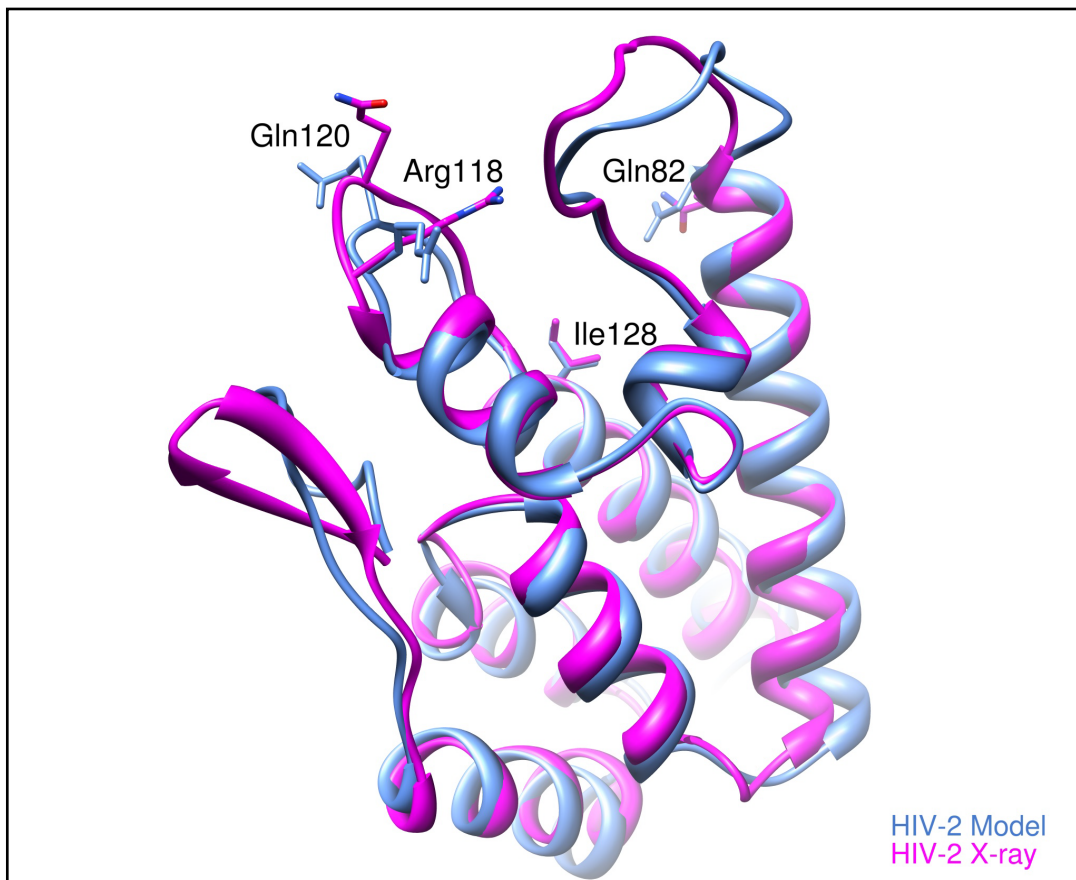

**Figure S1. Superimposition between the predicted and the identified structure of the N-terminal domain of the capsid of HIV2.**

The resolved structure of HIV2 CANTD (PDB: 2WLV) was superimposed with the predicted structure obtained as described in the Material and Methods. The RMSD is 0.9 Å.
