# Supplementary material
Source: PubMed Central journal article supplement (PMC3048699)
Supplement: supp_M110.187609_jbc.M110.187609-2.pdf [file supp_M110.187609_jbc.M110.187609-2.pdf]

TABLE S1. Sensitivity of MLV capsids mutants to various TRIM5 $\alpha$  alleles

| HIV strain          | huTRIM5 $\alpha$ |       | rhTRIM5 $\alpha$ |
|---------------------|------------------|-------|------------------|
|                     | WT               | R332A |                  |
| N                   | ++               | ++    | ++               |
| N L117H             | ++               | ++    | -                |
| N N82D              | ++               | ++    | -                |
| N L117H N82D        | ++               | (+)   | -                |
| N R110E             | ++               | -     | -                |
| N Q109T R110E       | -                | -     | -                |
| N R110E L117H       | -                | -     | -                |
| N R110A L117H       | ++               | +     | -                |
| N Q109T E110A L117H | (+)              | -     | -                |
| N L117H R110A N82D  | -                | -     | -                |
| B                   | -                | -     | -                |
| B E110R             | ++               | ++    | ++               |
| B T109Q E110R       | ++               | ++    | ++               |
| B E110A             | ++               | ++    | -                |
| B L117H             | -                | -     | -                |
| B N82D              | -                | -     | -                |
| B E110A L117H       | -                | -     | -                |
| B E110A N82D        | -                | -     | -                |
| B L117H E110A N82D  | -                | -     | -                |

fold restriction: -, less than 2; (+), 2 to 5 ; +, 5 to 10; ++, more than 10
