# Supplementary material
Source: PubMed Central journal article supplement (PMC3048699)
Supplement: supp_M110.187609_jbc.M110.187609-3.pdf [file supp_M110.187609_jbc.M110.187609-3.pdf]

**Table S2.** List of primers used in this study

| Description         | Primer name | Primer sequence (5' to 3')                                       |
|---------------------|-------------|------------------------------------------------------------------|
| HIV1 CA H120R       | PM341       | GGAACAAATAGGATGGATGACACGTAATCCACCTATCCCAGTAGG                    |
|                     | PM342       | CCTACTGGGATAGGTGGATTACGTGTCATCCATCCTATTTGTTCC                    |
| HIV1 CA G89V        | PM361       | GGGATAGAGTGCATCCAGTGCATGCAGTGCCTATTGCACCAGGCC                    |
|                     | PM362       | GGCCTGGTGAATAGGCACTGCATGCACTGGATGCACTCTATCCC                     |
| HIV1 CA P122Q       | PM451       | GGATGGATGACACATAATCAACCTATCCCAGTAGG                              |
|                     | PM452       | CCTACTGGGATAGGTTGATTATGTGTCATCCATCC                              |
| HIV1 CA V83Q        | PM449       | GCTGCAGAATGGGATAGACAGCATCCAGTGCATGC                              |
|                     | PM450       | GCATGCACTGGATGCTGTCTATCCATTCTGCAGC                               |
| HIV1 CA H120R P122Q | PM453       | GGATGGATGACACGTAATCAACCTATCCCAGTAGG                              |
|                     | PM454       | CCTACTGGGATAGGTTGATTACGTGTCATCCATCC                              |
| HIV1 CA Y130A       | PM468       | CCTATCCCAGTAGGAGAAATCGCTAAAAGATGGATAATCCTGGG                     |
|                     | PM469       | CCCAGGATTATCCATCTTTTAGCGATTCTCCTACTGGGATAGG                      |
| HIV1 CA W117A       | PM470       | CCCTTCAGGAACAAATAGGAGCGATGACACATAATCCACC                         |
|                     | PM471       | GGTGGATTATGTGTCATCGCTCCTATTGTTCCTGAAGGG                          |
| HIV1 CA W133A       | PM472       | CCTATCCCAGTAGGAGAAATCTATAAAAAGAGCGATAATCCTGGG                    |
|                     | PM473       | CCCAGGATTATCGCTCTTTTATAGATTCTCCTACTGGGATAGG                      |
| N-MLV CA F97A       | PM474       | CGAGGTTGACGCTGCTGCTCCCCTTGAACGTCC                                |
|                     | PM475       | GGACGTTCAAGGGGAGCAGCAGCGTCAACCTCG                                |
| N-MLV CA Y118A      | PM476       | GGAACCACCTAGTTCTCGCTCGCCAGTTGCTTTTAGCG                           |
|                     | PM477       | CGCTAAAAGCAACTGGCGAGCGAGAAGTAGGTGGTTCC                           |
| N-MLV CA W104A      | PM478       | CCTTGAACGTCCCGATGCGGATTACACCACCCAAAAGAGG                         |
|                     | PM479       | CCTCTTGGGTGGTGAATCCGCATCGGGACGTTCAAGG                            |
| sqTRIM5-HA          | PM407       | GCGGAATTCGCCACCATGGCTTCTGGAATCCTGG                               |
|                     | PM408       | CCATCGATTCAAGCGTAGTCTGGGACGTCGTATGGGTAGCCGCCAGAGCTTGGTGAGCACAGAG |
